# Supplementary material
Source: PubMed Central journal article supplement (PMC518834)
Supplement: pnas_101_38_13786__2.pdf [file pnas_101_38_13786__2.pdf]

## Supporting Text

**Replica Exchange Method.** Replica exchange technique more efficiently samples complex configuration spaces than constant temperature molecular dynamics (MD) simulations by periodically exchanging configurations that are running at a sequence of temperatures (1-4). We followed the two-step algorithm for the replica exchange MD (1). Step 1: A series of independent MD simulations are carried out simultaneously and independently for a certain number of MD steps with an optimal temperature distribution. Step 2: The pairs of configurations corresponding to neighboring temperatures are simultaneously exchanged with the probability determined by a Metropolis criterion that preserves detailed balance. We used the scheme suggested by Okamoto and coworkers (2): The pairing of neighboring temperatures is alternatively exchanged between two possible choices,  $(T1,T2)$ ,  $(T3,T4)$ ,  $\dots$  and  $(T2,T3)$ ,  $(T4,T5)$ ,  $\dots$  ( $T1 < T2 < T3 < \dots$ ). The replica exchange MD simulations with the interchain center-of-mass constraint were carried out in parallel with a modified AMBER package (5).

**Simulated Annealing.** To sample more thoroughly the conformational space of the symmetrized Go-type potential, we also performed sets of 50 runs of simulated annealing. These runs were performed with various values of dihedral force constants  $K_{\phi}^{(n)}$ . The parameters were optimized to approximately account for the flexibility of the dihedral angles without using any *a priori* information regarding domain-swapped structures. In these simulated annealing simulations, we applied a constraint of the form  $k \left[ \left| (r_{Val43} - r'_{Val43}) \right| - R_0 \right]^2$  to hold the two monomers close to each other. We set  $k=0.04\epsilon/r_0^2$ .  $r_{Val43}$  and  $r'_{Val43}$  are the positions of residues Val43 in two chains.  $R_0=5.26r_0$  was chosen as a distance between residues Val43 in the crystal domain-swapped structure. We note that although the value of  $R_0$  was determined from the domain-swapped structure, because the value of  $k$  is so small, a wide range of values of  $R_0$  yield similar results.

1. Sugita, Y. & Okamoto, Y. (1999) *Chem. Phys. Lett.* **314**, 141–151.
2. Mitsutake, A., Sugita, Y., & Okamoto, Y. (2001) *Biopolymers* **60**, 96–123.
3. Zhou, R., Berne, B. J., & Germain, R. (2001) *Proc. Natl. Acad. Sci. USA* **98**, 14931–14936.
4. Sanbonmatsu, K. & García, A. E. (2002) *Proteins* **46**, 225–234.
5. Case, D. A., Pearlman, D., Caldwell, J. W., Cheatham T. E., III, Ross, W. S., Simmerling, C. L., Darden, T. A., Merz, K. M., Stanton, R. V., Cheng, A. L., *et al.* (1999) AMBER 6 (Univ. of California, San Francisco).
