# Supplementary material
Source: PubMed Central journal article supplement (PMC518834)

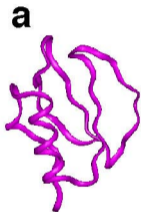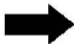

**b**

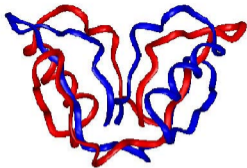

**+**

**c**

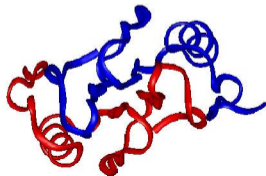

Supplement: pnas_101_38_13786__1.pdf [file pnas_101_38_13786__1.pdf]
